# Supplementary material for: Apparent recessive inheritance of sideroblastic anemia type 2 due to uniparental isodisomy at the SLC25A38 locus
Source: PubMed Central journal article supplement — Haematologica. 2020 Jul 23;105(12):2883–6. doi: 10.3324/haematol.2020.258533 (PMC7716369; doi:10.3324/haematol.2020.258533), 2020-07-23
Supplement: 2020_258533-Disclosures_Contributions.pdf [file 2020_258533-Disclosures_Contributions.pdf]

Haematologica  
HAEMATOL/2020/258533  
Version 3

Apparent recessive inheritance of sideroblastic anemia type 2 due to uniparental isodisomy at the SLC25A38 locus

Immacolata Andolfo, Stefania Martone, Michela Ribersani, Simona Bianchi, Francesco Manna, Rita Genesio, Antonella Gambale, Piero Pignataro, Anna Maria Testi, Achille Iolascon, and Roberta Russo

Disclosures: The authors state that they have no conflicts of interest to disclose.

Contributions: IA, RR designed and conducted the study, and prepared the manuscript; SM contributed to the preparation of the manuscript; FM performed the next-generation sequencing analysis; RG and PP performed the SNP array analysis; AMT, MR and SB took care of the patient and contributed to the preparation of the manuscript; SM and AG performed the genetic clinical counseling of the patient; AI provided critical review of the manuscript.
