# Supplementary material for: Apparent recessive inheritance of sideroblastic anemia type 2 due to uniparental isodisomy at the SLC25A38 locus
Source: PubMed Central journal article supplement — Haematologica. 2020 Jul 23;105(12):2883–6. doi: 10.3324/haematol.2020.258533 (PMC7716369; doi:10.3324/haematol.2020.258533), 2020-07-23
Supplement: 1052883_suppl.pdf [file 1052883_suppl.pdf]

**Apparent recessive inheritance of sideroblastic anemia type 2 due to uniparental isodisomy at the *SLC25A38* locus**

---

*Immacolata Andolfo,<sup>1,2</sup> Stefania Martone,<sup>1,2</sup> Michela Ribersani,<sup>3</sup> Simona Bianchi,<sup>3</sup> Francesco Manna,<sup>2</sup> Rita Genesio,<sup>4</sup> Antonella Gambale,<sup>2,4</sup> Piero Pignataro,<sup>4</sup> Anna Maria Testi,<sup>3</sup> Achille Iolascon<sup>1,2</sup> and Roberta Russo<sup>1,2</sup>*

*<sup>1</sup>Dipartimento di Medicina Molecolare e Biotecnologie Mediche, Università degli Studi di Napoli 'Federico II', Naples; <sup>2</sup>CEINGE Biotecnologie Avanzate, Naples; <sup>3</sup>Department of Translational and Precision Medicine, Sapienza University, Rome and <sup>4</sup>Dipartimento assistenziale integrato di Medicina di Laboratorio, UOC Genetica Medica, Azienda Ospedaliera 'Federico II', Naples, Italy*

*Correspondence: IMMACOLATA ANDOLFO - andolfo@ceinge.unina.it*

*doi:10.3324/haematol.2020.258533*

## **Apparent recessive inheritance of sideroblastic anemia type 2 due to uniparental isodisomy at the *SLC25A38* locus**

Immacolata Andolfo<sup>1,2\*</sup>, Stefania Martone<sup>1,2</sup>, Michela Ribersani<sup>3</sup>, Simona Bianchi<sup>3</sup>, Francesco Manna<sup>2</sup>, Rita Genesio<sup>1</sup>, Antonella Gambale<sup>2,4</sup>, Piero Pignataro<sup>1</sup>, Anna Maria Testi<sup>3</sup>, Achille Iolascon<sup>1,2</sup>, Roberta Russo<sup>1,2</sup>

<sup>1</sup>Dipartimento di Medicina Molecolare e Biotecnologie Mediche, Università degli Studi di Napoli 'Federico II', Napoli, Italy

<sup>2</sup>CEINGE Biotecnologie Avanzate, Napoli, Italy

<sup>3</sup>Department of Translational and Precision Medicine, Sapienza University, Rome, Italy

<sup>4</sup>Dipartimento assistenziale integrato di Medicina di Laboratorio, UOC Genetica Medica, Azienda Ospedaliera 'Federico II', Napoli, Italy

**Keywords:** uniparental isodisomy, *SLC25A38*, sideroblastic anemia type II.

**Running title:** uniparental isodisomy causes sideroblastic anemia type II.

### **\*Corresponding author: Immacolata Andolfo**

Department of Molecular Medicine and Medical Biotechnologies

University of Naples 'Federico II', 80145, Naples, Italy

CEINGE, Biotecnologie Avanzate,

Via Gaetano Salvatore, 486, 80145, Naples, Italy

Tel: +39-081-3737736

e-mail: [andolfo@ceinge.unina.it](mailto:andolfo@ceinge.unina.it)

### **Supplementary Information: Table of contents**

#### **Methods**

*Patients, genomic DNA preparation, and NGS analysis*

*Oligo-SNP array*

*Statistical analysis*

## **Methods**

### ***Patients, genomic DNA preparation, and NGS analysis***

Patient diagnosis was based on medical history, clinical findings, laboratory data, morphological analysis of peripheral blood and aspirated bone marrow. DNA samples were obtained after signed informed consent of the parents and according to the Declaration of Helsinki. The local University Ethical Committees approved the DNA sampling and the collection of patient samples ('Federico II' University of Naples). Genomic DNA preparation, genetic testing by targeted next-generation sequencing for hereditary anemias, and validation of the variant were performed as previously described.<sup>4</sup>

### ***Oligo-SNP array***

The oligo-SNP array analysis followed the protocol provided by the manufacturer, with the analysis on the proband and the parents performed using CytoGenomics v5.0.2 (Agilent Technologies, USA).

### ***Statistical analysis***

Statistical significances were determined using Student's t-tests. Two-sided  $p < 0.05$  was considered as statistically significant.
